# Supplementary material for: One-step synthesis of CdS–TiO2–chemically reduced graphene oxide composites via microwave-assisted reaction for visible-light photocatalytic degradation of methyl orange
Source: Royal Society of Chemistry journal article supplement (doi:10.1039/c2cy00452f), 2011-12-09
Supplement: c2cy00452f.pdf [file c2cy00452f.pdf]

# One-step synthesis of CdS-TiO<sub>2</sub>-chemically reduced graphene oxide composites via microwave-assisted reaction for visible-light photocatalytic degradation of methyl orange

Tian Lv<sup>a</sup>, Likun Pan<sup>a,\*</sup>, Xinjuan Liu<sup>a</sup>, Ting Lu<sup>a</sup>, Guang Zhu<sup>a</sup>, Zhuo Sun<sup>a</sup>, Changqing Sun<sup>b</sup>

<sup>a</sup>Engineering Research Center for Nanophotonics & Advanced Instrument, Ministry of Education, Department of Physics, East China Normal University, Shanghai 200062, China

<sup>b</sup>School of Electrical and Electronic Engineering, Nanyang Technological University, Singapore 639798 Singapore

Email: [lkpan@phy.ecnu.edu.cn](mailto:lkpan@phy.ecnu.edu.cn)

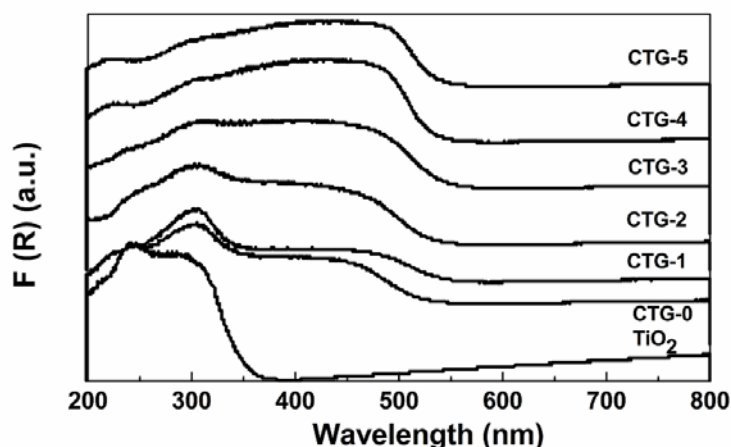

Fig. S1. Diffuse reflectance spectra of TiO<sub>2</sub>, CTG-0, CTG-1, CTG-2, CTG-3, CTG-4 and CTG-5.

The diffuse reflectance spectra was investigated through Kubelka-Munk function:  $K/S = F(R) = (1-R)^2/2R$ , to approximate the optical absorbance precisely, as shown in Fig. S1. The scattering is noted as S and reflectance is noted as R. The reflectance relates to the absorption coefficient  $\alpha$  (K/S) which is proportional to absorbance K. The pure TiO<sub>2</sub> absorbs the light at  $\lambda < 350$  nm and the absorption of CdS-TiO<sub>2</sub>-RGO composites is extended to

visible light of about 500 nm due to the incorporation of CdS. The absorbance of RGO is observed at ~230 nm.
